# Supplementary material for: Vitamin B6 cofactor-directed fluorescent “turn-on” detection of alkaline-phosphatase activity using bovine serum albumin-functionalized Mn–ZnS quantum dots
Source: Royal Society of Chemistry journal article supplement (doi:10.1039/d2sd00047d), 2022-01-01
Supplement: d2sd00047d1.pdf [file d2sd00047d1.pdf]

**Vitamin B<sub>6</sub> cofactor directed fluorescent turn-on detection of alkaline phosphatase activity  
using bovine serum albumin functionalized Mn-ZnS quantum dots**

**Sonkeshriya Dhanshri and Suban K Sahoo\***

Department of Chemistry, Sardar Vallabhbhai National Institute of Technology, Surat-395007,  
Gujarat, India.

\*E-mail: sks@chem.svnit.ac.in; suban\_sahoo@rediffmail.com; Tel: +91-9723220556.

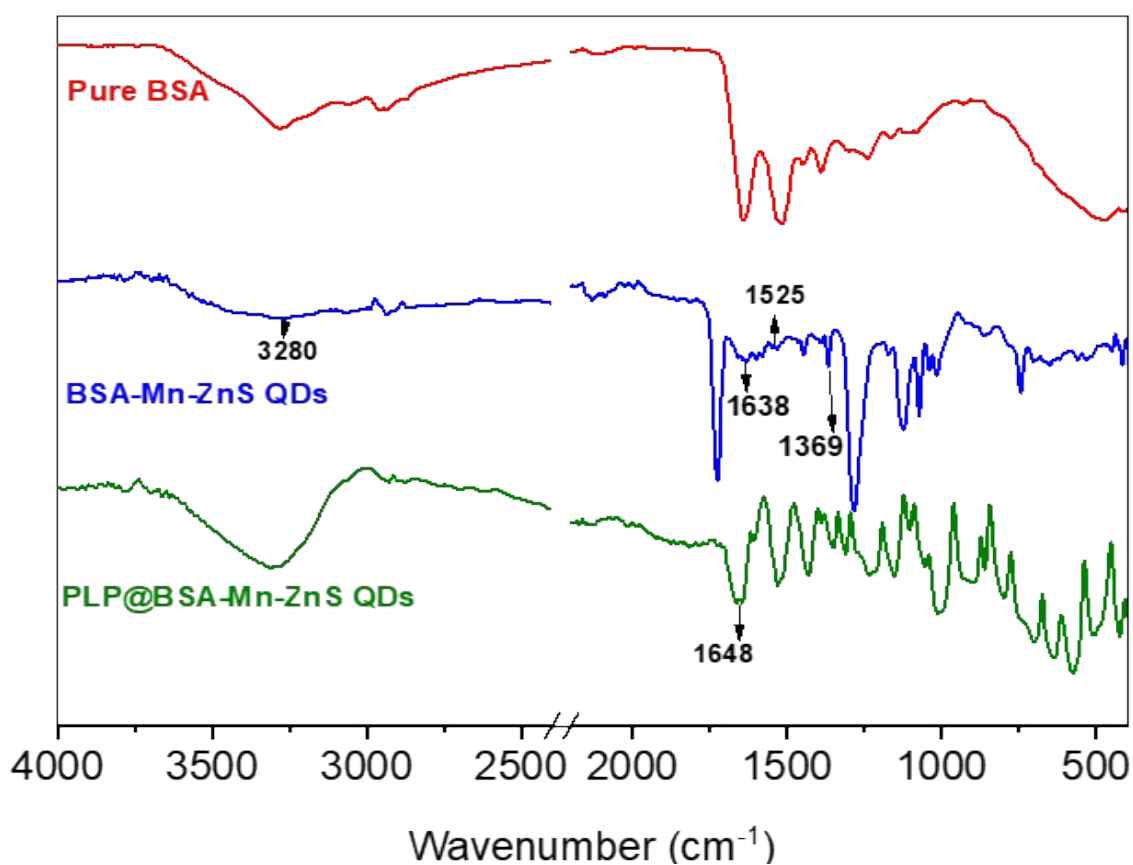

**Fig. S1.** FT-IR graph of BSA, BSA-Mn-ZnS QDs and PLP@BSA-Mn-ZnS QDs.

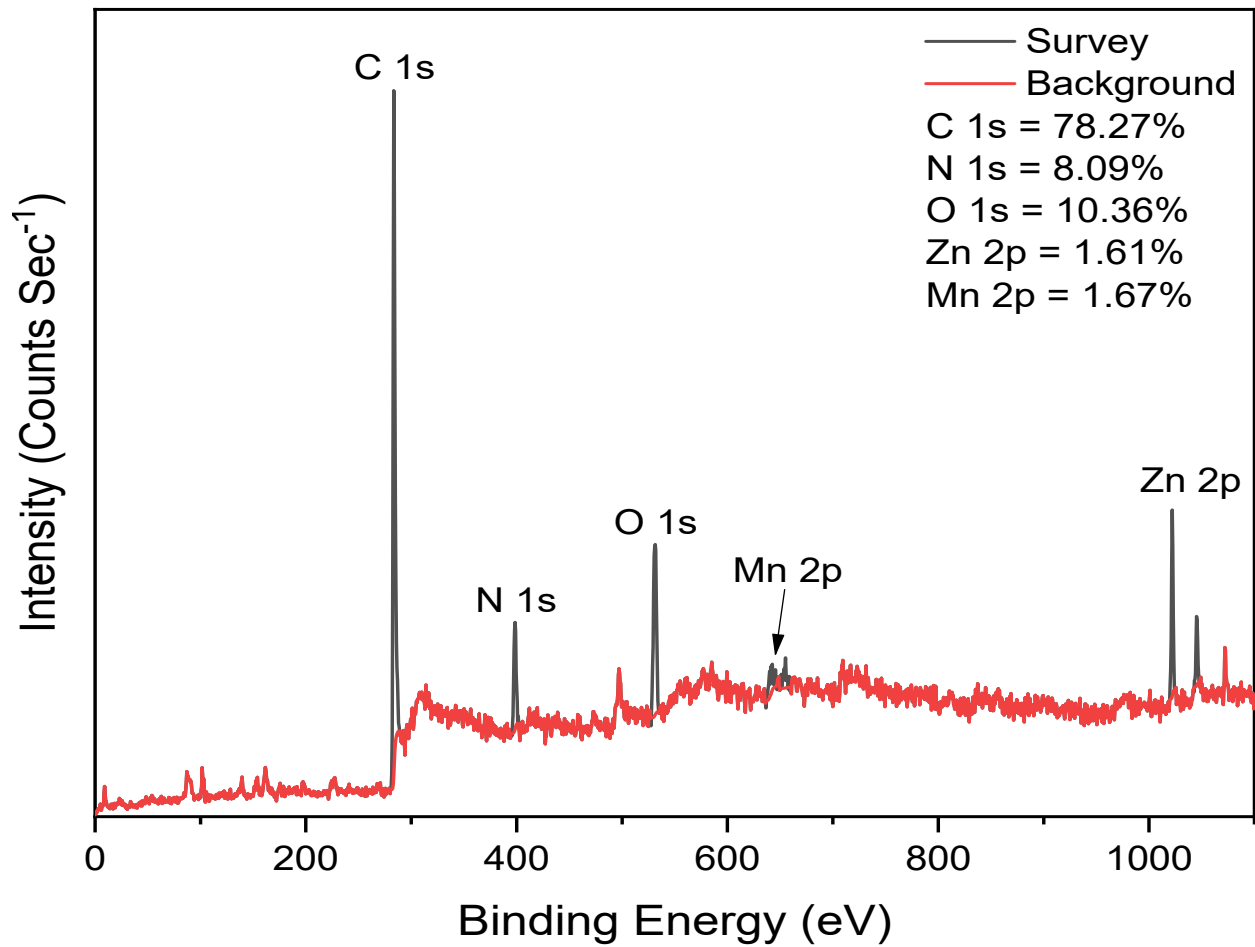

**Fig. S2.** XPS spectrum of PLP@BSA-Mn-ZnS QDs.

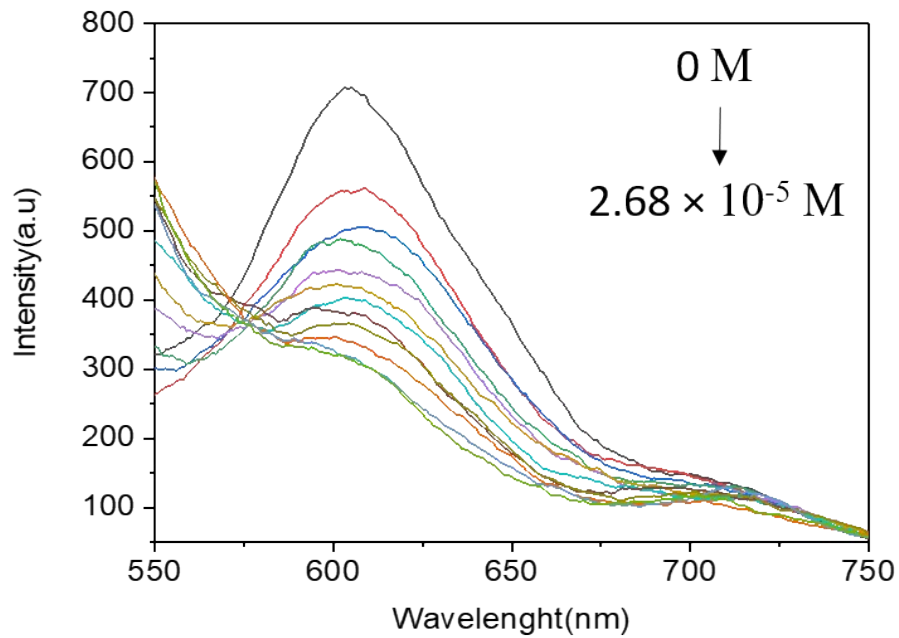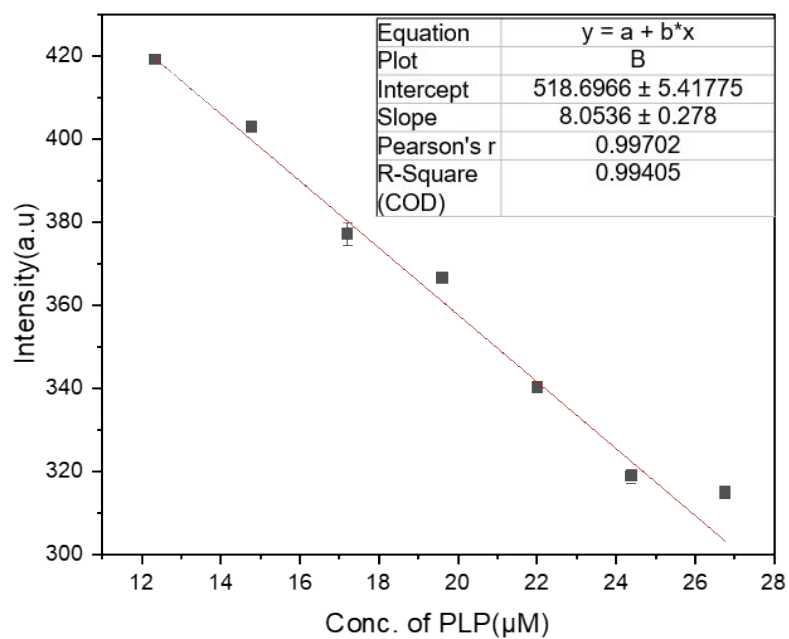

**Fig. S3.** Fluorescence spectral changes of BSA-Mn-ZnS QDs with increasing concentration of PLP (a) and the calibration curve to estimate the LOD of PLP (b).

**Table S1.** Comparison of different detection methods reported for ALP.

| Probes                                       | Linearity range        | LOD              | Intermediate used       | Ref.             |
|----------------------------------------------|------------------------|------------------|-------------------------|------------------|
| CQDs                                         | 4.6–383.3 U/L          | 1.4 U/L          | Ce <sup>3+</sup> , ATP  | 1                |
| BSA-AuNCs                                    | 1.0–200.0 U/L          | 0.05 U/L         | PLP                     | 2                |
| AuNCs                                        | 0.01–450 U/L           | 0.002 U/L        | AA2P                    | 3                |
| CuNPs                                        | 0.06–600 U/L           | 0.035 U/L        | PPi                     | 4                |
| CyP                                          | 0.01–2.0 U/mL          | 0.003 U/mL       | -                       | 5                |
| Phosphate-modified tetraphenylethylene probe | 3–526 U/L              | 0.2 U/L          | -                       | 6                |
| Eu <sub>3</sub> TC                           | 2.5–17.5 μmol/L        | 4 μmol/L         | Phenyl phosphate        | 7                |
| DEA                                          | 0.01–10 U/L            | 0.01 U/L         | 4-Aminophenyl phosphate | 8                |
| <i>m</i> -HPP                                | 0.02–2 U/L             | 0.0023 U/L       | Hydroxyphenyl phosphate | 9                |
| <b>BSA-Mn-ZnS QDs</b>                        | <b>0.005-0.047 U/L</b> | <b>0.003 U/L</b> | <b>PLP</b>              | <b>This work</b> |

PPi: Pyrophosphate; AA2P: ascorbic acid 2-phosphate; ATP: Adenosine tri-phosphate; CyP: hemicyanine-based fluorescent probe; Eu<sub>3</sub>TC: europium(III)-tetracycline; DEA: Diethanolamine; *m*-HPP: *m*-hydroxyphenyl phosphate sodium salt

## References

1. Z. Qian, L. Chai, C. Tang, Y. Huang, J. Chen and H. Feng, *Anal. Chem.*, 2015, **87**, 2966-2973.
2. M. I. Halawa, W. Gao, M. Saqib, S. A. Kitte, F. Wu and G. Xu, *Biosens. Bioelectron.*, 2017, **95**, 8-14.
3. X. L. Hu, X. M. Wu, X. Fang, Z. J. Li and G. L. Wang, *Biosens. Bioelectron.*, 2016, **77**, 666-672.
4. J. Li, L. Si, J. Bao, Z. Wang and Z. Dai, *Anal. Chem.*, 2017, **89**, 3681-3686.
5. S.-J. Li, C.-Y. Li, Y.-F. Li, J. Fei, P. Wu, B. Yang, J. Ou-Yang and S.-X. Nie, *Anal. Chem.*, 2017, **89**, 6854-6860.
6. J. Liang, R. T. K. Kwok, H. Shi, B. Z. Tang and B. Liu, *ACS Appl. Mater. Interfaces*, 2013, **5**, 8784-8789.
7. P. Schrenkhammer, I. C. Rosnizeck, A. Duerkop, O. S. Wolfbeis and M. Schäferling, *J. Biomol. Screen.*, 2008, **13**, 9-16.
8. J. Sun, J. Zhao, X. Bao, Q. Wang and X. Yang, *Anal. Chem.*, 2018, **90**, 6339-6345.
9. J. Zhao, S. Wang, S. Lu, G. Liu, J. Sun and X. Yang, *Anal. Chem.*, 2019, **91**, 7828-7834.

\*\*\*\*\*
